# Supplementary material
Source: PubMed Central journal article supplement (PMC2770578)
Supplement: NIHMS113829-supplement-1.pdf [file NIHMS113829-supplement-1.pdf]

Cell, Volume 136

## Supplemental Data

### Understanding the Words of Chromatin Regulation

Jiang I. Wu, Julie Lessard, and Gerald R. Crabtree

Table S1. Evolutionary conservation of SWI/SNF-like chromatin remodeling complexes from yeast, *Drosophila* and mammals

| Yeast                     |                                      |                            |                            | <i>Drosophila</i>            |                              | Human                           |                                |
|---------------------------|--------------------------------------|----------------------------|----------------------------|------------------------------|------------------------------|---------------------------------|--------------------------------|
| SWI/SNF                   | RSC                                  | Ino80                      | Swr1                       | BAP                          | PBAP                         | BAF                             | PBAF                           |
| <a href="#">Swi1</a>      |                                      |                            |                            | <a href="#">Eld/Osa</a>      |                              | <a href="#">BAF250a, b</a>      |                                |
| <a href="#">Swi2/Snf2</a> | <a href="#">Sth1</a>                 | <a href="#">Ino80</a>      | <a href="#">Swr1</a>       | <a href="#">Brahma</a>       | <a href="#">Brahma</a>       | <a href="#">Brg, Brm</a>        | <a href="#">Brg</a>            |
|                           | <a href="#">Rsc1, 2, 4</a>           |                            |                            |                              | <a href="#">Polybromo</a>    |                                 | <a href="#">BAF180</a>         |
|                           | <a href="#">Rsc9</a>                 |                            |                            |                              | <a href="#">BAP170</a>       |                                 | <a href="#">BAF200/ARID2</a>   |
| <a href="#">Swi3</a>      | <a href="#">Rsc8</a>                 |                            | <a href="#">Swc4</a>       | <a href="#">BAP155/Moira</a> | <a href="#">BAP155/Moira</a> | <a href="#">BAF155, 170</a>     | <a href="#">BAF155, 170</a>    |
|                           |                                      | <a href="#">Nhp10</a>      |                            | <a href="#">BAP111</a>       | <a href="#">BAP111</a>       | <a href="#">BAF57</a>           | <a href="#">BAF57</a>          |
| <a href="#">Swp73</a>     | <a href="#">Rsc6</a>                 |                            |                            | <a href="#">BAP60</a>        | <a href="#">BAP60</a>        | <a href="#">BAF60a, b, c</a>    | <a href="#">BAF60a, b, c</a>   |
| <a href="#">Arp7</a>      | <a href="#">Arp7</a>                 | <a href="#">Arp5, 8</a>    | <a href="#">Arp6</a>       | <a href="#">BAP55</a>        | <a href="#">BAP55</a>        | <a href="#">BAF53a, b</a>       | <a href="#">BAF53a, b</a>      |
| <a href="#">Arp9</a>      | <a href="#">Arp9</a>                 | <a href="#">Arp4</a>       | <a href="#">Arp4</a>       |                              |                              |                                 |                                |
|                           |                                      | <a href="#">Act1</a>       | <a href="#">Act1</a>       | <a href="#">BAP47/Actin</a>  | <a href="#">BAP47/Actin</a>  | <a href="#">β-actin</a>         | <a href="#">β-actin</a>        |
| <a href="#">Snf5</a>      | <a href="#">Sfh1</a>                 |                            |                            | <a href="#">Snr1</a>         | <a href="#">Snr1</a>         | <a href="#">BAF47/SNF5/Ini</a>  | <a href="#">BAF47/SNF5/Ini</a> |
|                           |                                      |                            |                            |                              | <a href="#">SAYP</a>         | <a href="#">BAF45a, b, c, d</a> |                                |
|                           | <a href="#">Rsc5, 10, 13, 14, 15</a> |                            |                            |                              |                              |                                 |                                |
|                           | <a href="#">Rsc3, 30, 58</a>         |                            |                            |                              |                              |                                 |                                |
| <a href="#">Swp82</a>     | <a href="#">Rsc7</a>                 |                            |                            |                              |                              |                                 |                                |
| <a href="#">Swp29</a>     |                                      | <a href="#">Swp29</a>      |                            |                              |                              |                                 |                                |
| <a href="#">Snf6, 11</a>  |                                      |                            |                            |                              |                              |                                 |                                |
|                           |                                      | <a href="#">Rvb1, 2</a>    | <a href="#">Rvb1, 2</a>    |                              |                              |                                 |                                |
|                           |                                      | <a href="#">Ies1, 3, 4</a> |                            |                              |                              |                                 |                                |
|                           |                                      |                            | <a href="#">Swc3, 5, 7</a> |                              |                              |                                 |                                |
|                           |                                      |                            | <a href="#">Vps71, 72</a>  |                              |                              |                                 |                                |
|                           |                                      |                            | <a href="#">Yaf9</a>       |                              |                              |                                 |                                |

The yeast Swi2/Snf2 ATPase and other subunits of the prototypical SWI/SNF chromatin-remodeling complex were identified in genetic screens of yeast deficient in mating type switching (SWItching mutants) and in sucrose fermentation (Sucrose NonFermenters, SNF mutants). RSC (for Remodel the Structure of Chromatin), a related yeast chromatin remodeling complex was identified by Cairns et al. (1996). Ino80 and Swr1 complexes are yeast SWI/SNF-related, ATP-dependent chromatin remodeling complexes that also share significant similarities with SWI/SNF complexes in higher organisms (Krogan et al., 2003; Mizuguchi et al., 2004; Shen et al., 2000). Interestingly, *Drosophila* and vertebrates have to some degree shuffled the subunits of yeast chromatin remodeling complexes possibly in response to the appearance of linker histones, a larger genome size and the need for tissue-specific heterochromatin. Yeast SWI/SNF and RSC complexes share Arp7 and Arp9 subunits, but not actin. The SWI/SNF-like BAF chromatin remodeling complexes in both *Drosophila* and mammals contain actin and Arp4 homologs, similar to yeast Ino80 and Swr1 complexes. In addition, BAF57, which has no homolog in the yeast SWI/SNF complex is similar to a subunit of Ino80 (nhp10). Swr1 subunit Swc4 also shares a SANT domain with BAF155 and BAF170. Mammalian SWI/SNF-like BAF complexes interact with Rb and HDAC and facilitate transcriptional repression ( Zhang et al., 2000).

### **Supplemental references**

- Cairns, B. R., Lorch, Y., Li, Y., Zhang, M., Lacomis, L., Erdjument-Bromage, H., Tempst, P., Du, J., Laurent, B., and Kornberg, R. D. (1996). *Cell* 87, 1249-1260.
- Krogan, N. J., Keogh, M. C., Datta, N., Sawa, C., Ryan, O. W., Ding, H., Haw, R. A., Pootoolal, J., Tong, A., Canadien, V., *et al.* (2003). *Mol Cell* 12, 1565-1576.
- Mizuguchi, G., Shen, X., Landry, J., Wu, W. H., Sen, S., and Wu, C. (2004). *Science* 303, 343-348.
- Shen, X., Mizuguchi, G., Hamiche, A., and Wu, C. (2000). *Nature* 406, 541-544.
- Zhang, H. S., Gavin, M., Dahiya, A., Postigo, A. A., Ma, D., Luo, R. X., Harbour, J. W., and Dean, D. C. (2000). *Cell* 101, 79-89.

**Supplemental Figure:** Alignments of the components of SWI/SNF-like complexes in yeast, *Drosophila* and mammals. Identical amino acids in more than half of the aligning proteins are boxed. While several subunits of the BAF complex do not have true homologues in yeast, BAF250 shares an ARID domain and LxxLL motif with Swi1, BAF180 shares two Bromodomains and one BAH domain with Rsc1/2 of the RSC complex, BAF57 shares an HMG domain with nhp10 of the Ino80 complex, and BAF53 is most close to Arp4 of the Swr1 complex. In addition, mammalian BAF complexes contain actin, similar to the Ino80 and Swr1 complexes, while yeast SWI/SNF and RSC do not have actin. BAF250 and ARID2 (BAF200) share the similarity of an ARID domain.

The conserved domains are highlighted in colors:

**Brg/Brm**, HSA domain in green; BRK domain in yellow; SNF2-like ATPase domain in red and Bromodomain in blue.

**BAF155/BAF170**, Chromo-related domain in green; SWIRM domain in yellow; SANT domain in red and Leu-zipper in blue. Note that yeast Swi3 has no conserved Chromo-related domain.

**BAF60**, SWIB/MDM2 domain in blue.

**BAF57**, HMG domain in blue; Coiled-coil domain in yellow. The alignments of HMG domains and potential Coiled-coil regions of BAF57 and yeast nhp10, an Ino80 complex subunit, are shown separately.

**BAF53**, the diverse actin-fold subdomain 2 is underlined.

**BAF47**, SNF5 domain in blue.

**BAF45a** and *Drosophila* SAYP are likely homologues and share similarities throughout the protein including 2 PHD domains (in yellow). SAYP has a long N-terminal extension that is not present in vertebrates.

**BAF45**, N-terminal domain in red; Krüppel domain in blue and PHD domains in yellow. *Drosophila* dd4 protein is the fly BAF45 homologue and is likely a BAP subunit although hasn't been shown experimentally. No yeast homologues are identified.

**BAF180**, Bromodomains in blue; BAH domains in yellow and HMG domain in red. Note that yeast Rsc1 and Rsc2 have only two Bromodomains and one BAH domain.

**BAF250**, ARID domain in blue; C1 region in red and C2 region in green.

**BAF200**, ARID domain in red; RFX domain in blue and Zn fingers in green.

The alignment of the ARID domains of BAF250 and BAF200 is shown separately.



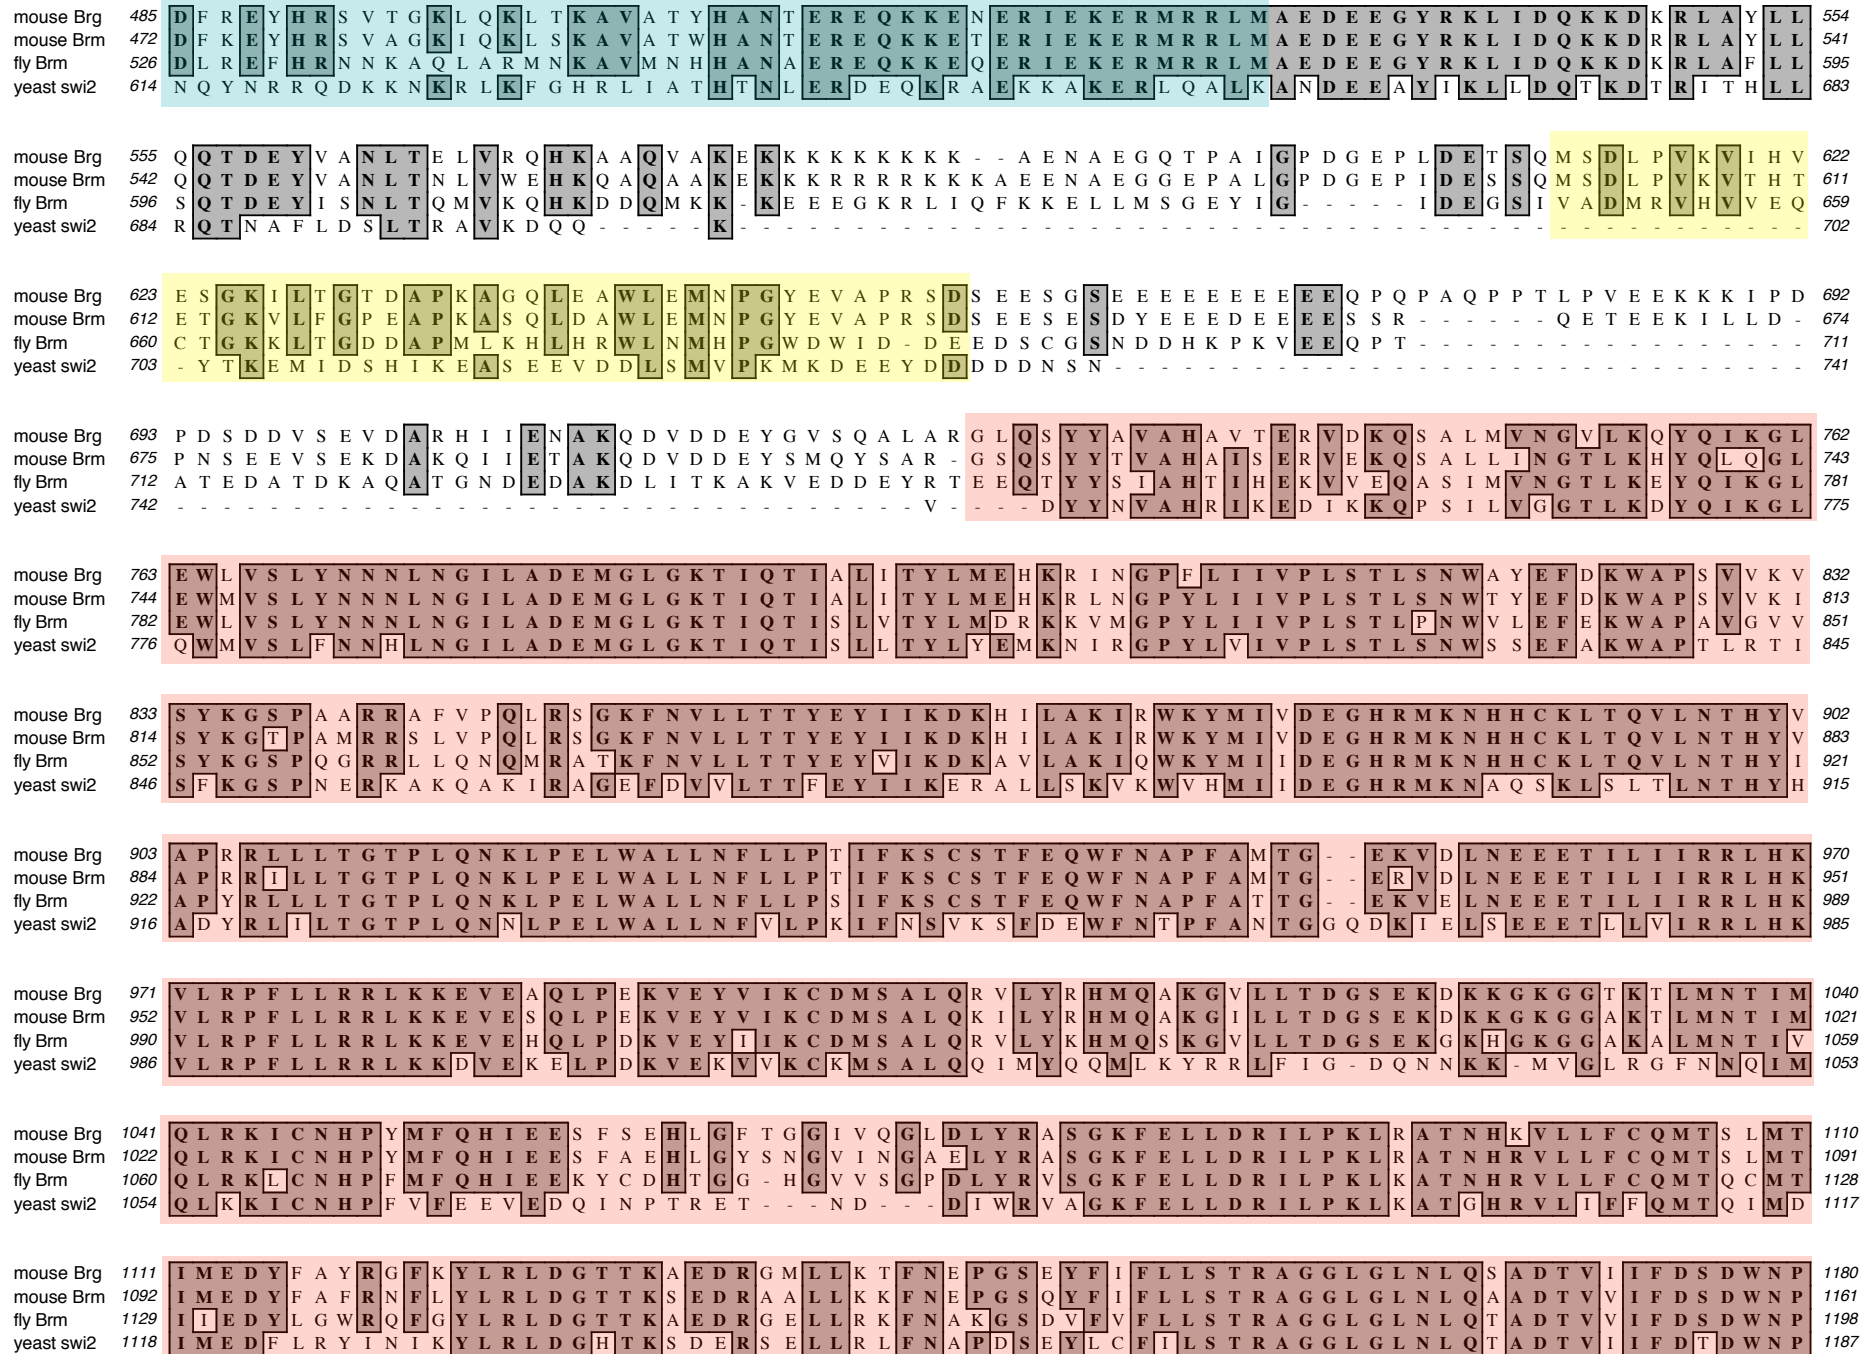



BAF155/BAF170

|              |     |                                                                                                                                                   |                   |                     |               |                                   |                         |     |
|--------------|-----|---------------------------------------------------------------------------------------------------------------------------------------------------|-------------------|---------------------|---------------|-----------------------------------|-------------------------|-----|
| mouse BAF155 | 1   | M A A T A G G G P G A A A G A V G A G G A A A A S G L A V Y R R                                                                                   | K D G G           | P A S K F W E S P D | T V S Q L D S | V R R V W L G K H Y K K Y         | V H A - -               | 68  |
| mouse BAF170 | 1   |                                                                                                                                                   | M A V R K K D G G | P N V K Y Y E A A D | T V T Q F D N | V R R L W L G K N Y K K Y         | I Q A - -               | 41  |
| fly BAP155   | 1   | M N T L G P K                                                                                                                                     | K D G S           | P N I D F F Q S P E | T L Q G F E S | I R Q W L Q K N C K K Y           | L A H S S               | 45  |
| yeast swi3   | 1   | M E N T L G E - - -                                                                                                                               | G S - - - - -     | - - - - -           | T V N A S V D | V D Q H G N D N N S D S N A N - - | - -                     | 31  |
|              |     |                                                                                                                                                   |                   |                     |               |                                   |                         |     |
| mouse BAF155 | 69  | D A P T N K T L A G L V V Q L L Q F Q E D A F G K H V T N P A F T K L P A K C F M D F K A G G T L C H I L G A A Y K Y K N E Q G W R R F D L       |                   |                     |               |                                   |                         | 138 |
| mouse BAF170 | 42  | E P P T N K S L S S L V V Q L L Q F Q E E V F G K H V S N A P L T K L P I K C F L D F K A G G S L C H I L A A A Y K F K S D Q G W R R Y D F       |                   |                     |               |                                   |                         | 111 |
| fly BAP155   | 46  | E P I T K E S L A Q L L I H F L Q Y V E A K L G K N S A D P P A T R I P M R C F L D F K S G G G L C I I F S T M F R F R A E Q R G K K F D F       |                   |                     |               |                                   |                         | 115 |
| yeast swi3   | 32  | - A A V A G V A N T D T A G E E S Q Q Q D E S L K D E A T V P N T R D A E S E A I T V T A K - - - - -                                             |                   |                     |               |                                   | Q Q P T M Q A N K L D S | 88  |
|              |     |                                                                                                                                                   |                   |                     |               |                                   |                         |     |
| mouse BAF155 | 139 | Q N - - - P S R M D R N V E M F M N I E K T L V Q N N C L T R P N I Y L I P D I D L K L A N K L K D I I K R H Q G T F T D E K S K A S H H I       |                   |                     |               |                                   |                         | 205 |
| mouse BAF170 | 112 | Q N - - - P S R M D R N V E M F M T I E K S L V Q N N C L S R P N I F L C P E I E P K L L A N K L K D I V K R H Q G T I S E D K S N A S H V V     |                   |                     |               |                                   |                         | 178 |
| fly BAP155   | 116 | S I G K N P T R K D P N I Q L L I E I E Q A L V E A D L Y R I P Y I Y I R P E I E K G F E G K L R E I L D N R R V E I V S D E E D A T H I V       |                   |                     |               |                                   |                         | 185 |
| yeast swi3   | 89  | Q E - - - - - - - - - - - - - - - T P S T E E S R A Q N V F G Q D N - - - - - - - - - - - - - - - E D S D N L F G E T E S S V S N N E A N T       |                   |                     |               |                                   |                         | 128 |
|              |     |                                                                                                                                                   |                   |                     |               |                                   |                         |     |
| mouse BAF155 | 206 | Y P Y P S S Q E D E E W L R P V M R R D K Q V L V H W G F Y P D S Y D T W V H S N D V D A E I E D A P I P E K P - - - - - W K V H V K W I         |                   |                     |               |                                   |                         | 269 |
| mouse BAF170 | 179 | Y P V P G N L E E E E W V R P V M K R D K Q V L L H W G Y Y P D S Y D T W I P A S E I E A S V E D A P T P E K P - - - - - R K V H A K W I         |                   |                     |               |                                   |                         | 242 |
| fly BAP155   | 186 | Y P V V D P H P D - E Y A R P I F K R G G H Y M L H W Y Y F P E S Y D S W A V N - - - N F D L P D H I P E N P E S P A E R W R V S A S W I         |                   |                     |               |                                   |                         | 250 |
| yeast swi3   | 129 | P S I P T N P V D N E N N K P A I K E D S T I Q D S N G D V K N M E D V K I Q K - - - - - E E E P E N N T V I E G - - - - - V K E E S Q           |                   |                     |               |                                   |                         | 186 |
|              |     |                                                                                                                                                   |                   |                     |               |                                   |                         |     |
| mouse BAF155 | 270 | L D T D V F N E W M N E E D Y E V D E N R K P V S F R Q R I S T K N E E P V R - S P E - - - - - R R D R K A S A N S R K R K P S P S P P P P T A T |                   |                     |               |                                   |                         | 336 |
| mouse BAF170 | 243 | L D T D T F N E W M N E E D Y E V S D D K S P V S R R K K I S A K T L T D E V N S P D S D R R D - K K G G N Y K K R K R S P S P S P - - - - - T P |                   |                     |               |                                   |                         | 309 |
| fly BAP155   | 251 | V D L E Q Y N E W M A E E D Y E V D E Q G K K T H K Q R M S I D D I M S F G - - D E K K K P A A S S G G G K Q K R R R S P S P A S S A S T         |                   |                     |               |                                   |                         | 318 |
| yeast swi3   | 187 | P D E N T K E M D E V E E D D E D D Q - - - P - - - - - M I S P D N S I F G D T K S E S - - - K Q - - - L G N T S S V A N T P S E I P - D A H     |                   |                     |               |                                   |                         | 243 |
|              |     |                                                                                                                                                   |                   |                     |               |                                   |                         |     |
| mouse BAF155 | 337 | E S R K K S G K K G Q A S L Y G K R R S Q K E E D E Q E D L T K D M E D P T P V P N I E E V V L P K N V N P K K D S E N - - - - - - - - -         |                   |                     |               |                                   |                         | 396 |
| mouse BAF170 | 310 | E A K K K N A K K G P S T P Y T K S K R G H R E E E Q E D L T K D M D E P S P V P N V E E V T L P K T V N T K K D S E S - - - - - - - - -         |                   |                     |               |                                   |                         | 369 |
| fly BAP155   | 319 | S K P G K R - K R S P A V V H K K S R N - - - D D D E D L T R D L D D P A E P N V Q E V H K A N A A L Q S T A S P A P G G K S R G D N D           |                   |                     |               |                                   |                         | 384 |
| yeast swi3   | 244 | K A E Q E D I I E K T E S V D K K V D S G E E R N E Q E R E I M N D H S K S A N P - - - - - - - - - - - - - - - - - - - -                         |                   |                     |               |                                   |                         | 284 |
|              |     |                                                                                                                                                   |                   |                     |               |                                   |                         |     |
| mouse BAF155 | 397 | - T P V K G G T V A D L D E Q D E E - - - - - A V T T G G K - E D E D P S - - - K G D P S R S V D P G - - - - - - - - - E D N V T E Q T N H I I   |                   |                     |               |                                   |                         | 449 |
| mouse BAF170 | 370 | - A P V K G G T M T D L D E Q D D E - - - - - S M E T T G K D E D E N S T G N K G E Q T K N P D L H - - - - - - - - - E D N V T E Q T H H I I     |                   |                     |               |                                   |                         | 425 |
| fly BAP155   | 385 | M M P I K G G T M T D L D D E M T G G S A A Q A M S T I G D G - - - - - E N S Q T G K T S D N S N T Q E F S S S A K E D M E D N V T E Q T H H I I |                   |                     |               |                                   |                         | 451 |
| yeast swi3   | 285 | - - - K - T T I T R V E P E T F E I P - - - - - - - - - - - - - - - - - - - - - - - - - - - - - - - - - - - - - - - - - - - - - -                 |                   |                     |               |                                   |                         | 306 |
|              |     |                                                                                                                                                   |                   |                     |               |                                   |                         |     |
| mouse BAF155 | 450 | I P S Y A S W F D Y N C I H V I E R R A L P E F F N G K N K S K T P E I Y L A Y R N F M I D T Y R L N P Q E Y L T S T A C R R N L T G D V C       |                   |                     |               |                                   |                         | 519 |
| mouse BAF170 | 426 | I P S Y A A W F D Y N S V H A I E R R A L P E F F N G K N K S K T P E I Y L A Y R N F M I D T Y R L N P Q E Y L T S T A C R R N L A G D V C       |                   |                     |               |                                   |                         | 495 |
| fly BAP155   | 452 | V P S Y S A W F D Y N S I H V I E K R A M P E F F N S K N K S K T P E I Y M A Y R N F M I D T Y R L N P T E Y L T S T A C R R N L A G D V C       |                   |                     |               |                                   |                         | 521 |
| yeast swi3   | 307 | I P S Y S K W F N L E K I H S I E V Q S L P E F F T N R I P S K T P E I Y M R Y R N F M V N S Y R L N P N E Y F S V T T A R R N V S G D A         |                   |                     |               |                                   |                         | 376 |
|              |     |                                                                                                                                                   |                   |                     |               |                                   |                         |     |
| mouse BAF155 | 520 | A V M R V H A F L E Q W G L V N Y Q V D P E S R P M A M G P P P T P H F N V L A D T P S G L V P L H L R S P Q - V P A A Q Q M L N F P E K N       |                   |                     |               |                                   |                         | 588 |
| mouse BAF170 | 496 | A I M R V H A F L E Q W G L I N Y Q V D A E S R P T P M G P P P T S H F H V L A D T P S G L V P L Q P K P P Q Q S S A S Q Q M L N F P E K G       |                   |                     |               |                                   |                         | 565 |
| fly BAP155   | 522 | A I M R V H A F L E Q W G L I N Y Q I D A D V R P T P M G P P P T S H F H I L S D T P S G L Q S I N P Q K T Q Q P S A A K T L L D L D K K P       |                   |                     |               |                                   |                         | 591 |
| yeast swi3   | 377 | A L F R L H K F L T K W G L I N Y Q V D S K L L P K N I E P P L T S Q Y S T R H D A P R G L F P F E S Y K P S - - - - - V Q L P D M A K L K       |                   |                     |               |                                   |                         | 441 |
|              |     |                                                                                                                                                   |                   |                     |               |                                   |                         |     |
| mouse BAF155 | 589 | K E K P - - - - - - - - - - - - - - - - - - - - - - - - - - - - - - - - - - - - - - - - - - - - - - - - - - - - - - - - - - -                     |                   |                     |               |                                   |                         | 627 |
| mouse BAF170 | 566 | K E K P - - - - - - - - - - - - - - - - - - - - - - - - - - - - - - - - - - - - - - - - - - - - - - - - - - - - - - - - - - -                     |                   |                     |               |                                   |                         | 606 |
| fly BAP155   | 592 | L G K D G G L E L G D K S G L T G I K T E A L E N G A A G G L S S G V S Q F G L K L D Q Y A K K P A A M R N R - T A A S M A R E W T D Q E T       |                   |                     |               |                                   |                         | 660 |
| yeast swi3   | 442 | K M M N T S D S E S - T L Y K Y L K E S K R K Y D E I T H P P S T T D D E N G D K N D N G G K M N N E V S T S T S M T G D A N L L E E G E T       |                   |                     |               |                                   |                         | 510 |







### BAF57

mouse BAF57 1 M S K R P S Y A P P P T P A P A T Q M P S T P G F V G Y N P Y S H L A Y N N Y R L G G - - - - - N P G - T N S R V T A 53  
 fly BAP111 1 M A L P S N Y K Q I A V G G Q G S A T P L Q G G G G S G G G S R S R S S G G G G G D R N K D Q T P I F T H S N Y G N P A F T P Q K V T K 70

mouse BAF57 54 S S G - - - - I T I P K P P K P P D K P L M P Y M R Y S R K V W D Q V K A S N P D L K L W E I G K I I G G M W R D L T D E E K Q E Y L N 117  
 fly BAP111 71 S S S S K N Q N E S R L P K P P K P P E K P I L P Y M R Y S K R V W D S V K A K H P E L K L W E L G K K I G A M W K L L P E D E K T E F I D 140

mouse BAF57 118 E Y E A E K I E Y N E S M K A Y H N S P A Y L A Y I N A K S R A E A A L E E E S R Q R Q S R M E K G - - E P Y M S I Q P A E D P D D Y D D G 185  
 fly BAP111 141 E Y E A E K L E Y E K S L K A Y H Q T P A Y Q A Y M S A K S K V K T D V D M H E T P S R G G G S K S Q H E R R I D I Q P A E D E D D Q D E G 210

mouse BAF57 186 F S M K H T A T A R F Q R N H R L I S E I L S E S V V P D V R S V V T T A R M Q V L K R Q V Q S L M V H Q R K L E A E L L Q I E E R H Q E K 255  
 fly BAP111 211 Y T T K H L A Y A R Y L H N H R L I N E I F S E A V V P D V R S V V T T T R M Q V L K R Q V S S L T M H Q T K L E A E L Q Q M E E K F E A K 280

mouse BAF57 256 K R K F L E S T D S F N N E L K R L C G L K V E V D M E K I A A E I A Q A E E Q A R K - R Q E E R E K - - - - - E A A 308  
 fly BAP111 281 K Q R M V E S S E A F Q E E L K R H C - - K P A V D E E T F Q K M V L R M Y E D I K R D R Q R L D E P N A N A N S A A N P A A A A T A A A 348

mouse BAF57 309 E Q A E R S Q S S M A P E E E - - Q - V A N K A E E K - - - - - K - - - - - D E E S I P M E T E E T H L E D T 350  
 fly BAP111 349 A P V T R S E E A V K P P T Q P G Q P A A T P A G Q E P A S A V P A P A A P P K E T P P A V K P A T L N P T P S S T P T P A P A V H V H E T 418

mouse BAF57 351 A E S Q Q - - - N G E E G - - T S T P E D - - K E S G Q E G V D S M E V E G T S D S N T G S E - - - - S N S A T V E E P P T D P V P E D 407  
 fly BAP111 419 A S K T D P E P M D I E P P P K P S V P P P P I K P E K L E M A A A L P P Q S T L V E P P K T E P A K V V A Q P G K V P T P V P T P T P P P 488

mouse BAF57 408 E K K E 411  
 fly BAP111 489 E V A P A A G A A T A A T T T 503

### HMG Domain

mouse BAF57 64 K P P D K P L M P Y M R Y S R K V W D Q V K A S N P D L K L W E I G K I I G G M W R D L T D E E K Q E Y L N E Y E A E K I E Y N E S M K A Y 133  
 fly BAP111 87 K P P E K P I L P Y M R Y S K R V W D S V K A K H P E L K L W E L G K K I G A M W K L L P E D E K T E F I D E Y E A E K L E Y E K S L K A Y 156  
 yeast nhp10-HMG 95 K R P T N A Y L L Y C E M N K E R I R Q N G S L D V T R D L A E G W K N L N E Q D R K P Y Y K L Y S E D R E R Y Q M E M E I Y N K K I S N I 164

### Potential Coiled-Coil

mouse BAF57 218 V V T T A R M Q V L K R Q V Q S L M V H Q R K L E A E L L Q I E 249  
 yeast nhp10 13 L K D Q N V V L G L A I Q R S R L S V K R L K L E Y G V L L E R 44

### BAF53

|              |     |                                                                                                                                                                                                                                                  |     |
|--------------|-----|--------------------------------------------------------------------------------------------------------------------------------------------------------------------------------------------------------------------------------------------------|-----|
| mouse BAF53a | 1   | <b>M S G G G</b> - - - <b>V Y G G D E V G A L V F D</b> I <b>G S</b> Y T V <b>R A</b> <b>G Y A G E D C</b> <b>P K</b> V D F <b>P</b> T A I <b>G</b> V V L E R D D G S T - - - M M E I D G D K G K Q G                                            | 64  |
| mouse BAF53b | 1   | <b>M S G G G</b> - - - <b>V Y G G D E V G A L V F D</b> I <b>G S</b> F S V <b>R A</b> <b>G Y A G E D C</b> <b>P K</b> A D F <b>P</b> T T V <b>G</b> L L A <b>A E</b> <b>E</b> G G - - - - G L E L E G E K E K K G                                | 62  |
| fly BAP55    | 1   | <b>M S G G G</b> T M - <b>L Y G G D E I G A L V F D</b> P <b>G H</b> H S L <b>R V</b> <b>G Y A Q E D S</b> <b>P K</b> A E I <b>P</b> S V V <b>G</b> I G A <b>A P</b> <b>E</b> T N L D P E T K T D N N A T P N N A D                              | 69  |
| yeast arp4   | 1   | <b>M S</b> <b>N</b> A A L Q <b>V Y G G D E V S</b> <b>A V</b> <b>V I</b> D P <b>G S</b> Y T T N I <b>G Y</b> <b>S</b> <b>G S</b> <b>D</b> F <b>P</b> Q S I L <b>P</b> S V Y <b>G</b> K Y T <b>A D</b> <b>E</b> G N - - - - - - - - - - - - - - - | 53  |
| <hr/>        |     |                                                                                                                                                                                                                                                  |     |
| mouse BAF53a | 65  | G P T Y Y I <b>D T N</b> A L R <b>V P R</b> E N M <b>E</b> A I S P L <b>K N G M</b> V E <b>D W D S</b> <b>F</b> Q A I L <b>D</b> H T <b>Y</b> K M H V K <b>S E</b> A S - L <b>H P V L</b> M <b>S E A</b> P <b>W N</b> T <b>R A K R</b>           | 133 |
| mouse BAF53b | 63  | - K I F H I <b>D T N</b> A L H <b>V P R</b> D G A <b>E</b> V M S P L <b>K N G M</b> I E <b>D W E C</b> <b>F</b> R A I L <b>D</b> H T <b>Y</b> S K H V K <b>S E</b> P N - L <b>H P V L</b> M <b>S E A</b> P <b>W N</b> T <b>R A K R</b>           | 130 |
| fly BAP55    | 70  | Q R K F Y V <b>D T N</b> Y V T <b>V P R</b> S N M <b>E</b> V Q T Y M <b>K D</b> <b>G M</b> I D N <b>W D L</b> <b>F</b> E K V I <b>D</b> Y A <b>Y</b> A N V I Q <b>S E</b> P E - Y <b>H P V L</b> F <b>S E A</b> S <b>W N</b> V <b>R N N R</b>    | 138 |
| yeast arp4   | 54  | - - K K I F S E Q S I G I <b>P R</b> K D Y <b>E</b> L K P I I E <b>N G</b> L V I <b>D W D</b> T A Q E Q W Q W A L Q N E L Y L N S N S G I <b>P A</b> L L T <b>E</b> P V <b>W N</b> S T E N <b>R</b>                                              | 121 |
| <hr/>        |     |                                                                                                                                                                                                                                                  |     |
| mouse BAF53a | 134 | <b>E K L T E L M F E</b> H <b>Y S</b> I <b>P A F F L</b> C <b>K T A V L</b> T <b>A F A N</b> <b>G R S</b> T <b>G</b> L I L <b>D S G A T H T</b> T <b>A I</b> <b>P V H D G Y V L</b> Q <b>Q</b> G I <b>V K S P L A G D F I</b> T                  | 203 |
| mouse BAF53b | 131 | <b>E K L T E L M F E</b> Q <b>Y N</b> I <b>P A F F L</b> C <b>K T A V L</b> T <b>A F A N</b> <b>G R S</b> T <b>G</b> L V L <b>D S G A T H T</b> T <b>A I</b> <b>P V H D G Y V L</b> Q <b>Q</b> G I <b>V K S P L A G D F I</b> S                  | 200 |
| fly BAP55    | 139 | <b>E K L T E L M F E</b> K <b>Y N</b> V <b>P A F F L</b> V <b>K N</b> <b>A V L A</b> <b>A F S S</b> <b>G R A</b> T <b>A</b> L V V <b>D S G A T H T</b> S <b>A V</b> <b>P V H E</b> <b>G Y V L S</b> <b>Q</b> A V <b>V K S P L G D F L S</b>      | 208 |
| yeast arp4   | 122 | K <b>K S</b> L <b>E</b> V L L <b>E</b> G M Q F <b>E</b> <b>A C Y L</b> A P <b>T S</b> T C V S <b>F A A</b> <b>G R</b> P N C <b>L V</b> V <b>D I G</b> H D T C S V S <b>P I</b> V <b>D G M T L S</b> K S T R R N F I <b>A G K F I</b> N           | 191 |
| <hr/>        |     |                                                                                                                                                                                                                                                  |     |
| mouse BAF53a | 204 | M <b>Q C R</b> E L F Q E M N <b>I E</b> L <b>I P P</b> Y M <b>I A S</b> - - <b>K E A</b> V R - - - - <b>E</b> G S P A N W K - - - - - R K <b>E</b> K L P Q V T R <b>S W H</b> <b>N Y M</b> C N C V I                                             | 259 |
| mouse BAF53b | 201 | M <b>Q C R</b> E L F Q E M A <b>I D</b> I <b>I P P</b> Y M <b>I A A</b> - - <b>K E P</b> V R - - - - <b>E</b> G A P P N W K - - - - - K K <b>E</b> K L P Q V S K <b>S W H</b> <b>N Y M</b> C N E V I                                             | 256 |
| fly BAP55    | 209 | R <b>Q C R</b> Q H L E K H G <b>I D</b> L S <b>P V</b> Y <b>K I A S</b> - - <b>K D V</b> K - - - - - <b>E</b> R D N G R F T - - - - - L R K L P E N L T Q <b>S W Q</b> <b>N Y M</b> L Q L M M                                                    | 264 |
| yeast arp4   | 192 | H L I K K A L E P K - - E I <b>I P</b> L F A <b>I K</b> Q R K P <b>E F</b> I K K T F D Y <b>E</b> V D K S L Y D Y A N N R G F F Q <b>E</b> C K E T L C H I C P T K T L E E T K                                                                   | 259 |
| <hr/>        |     |                                                                                                                                                                                                                                                  |     |
| mouse BAF53a | 260 | <b>Q D F Q</b> A S <b>V L Q V</b> S D <b>S T Y D E</b> Q <b>V A A Q M P T</b> - - - - - - - - - - - - - - - <b>V H Y E F P N G</b> - - - - <b>Y N C</b> <b>D F G A E R</b> L K <b>I P E G</b>                                                    | 307 |
| mouse BAF53b | 257 | <b>Q D F Q</b> A S <b>V L Q V</b> S D <b>S P Y D E</b> Q <b>V A A Q M P T</b> - - - - - - - - - - - - - - - <b>V H Y E M P N G</b> - - - - <b>Y N T</b> <b>D Y G A E R</b> L R <b>I P E G</b>                                                    | 304 |
| fly BAP55    | 265 | <b>Q D F Q</b> M N <b>V L Q V</b> L E N <b>P F D E</b> R <b>V A A Q I P T</b> - - - - - - - - - - - - - - - <b>V H Y E F P N G</b> - - - - <b>Y H Q</b> <b>D F G S E R</b> F K <b>I A E S</b>                                                    | 312 |
| yeast arp4   | 260 | T E L S S T A K R S I E <b>S P</b> W N <b>E</b> I V F D N E <b>T</b> R Y G F A E E L F L P K E D D I P A N W P R S <b>N S</b> G V V K T W R N <b>D Y</b> V P L K R T K <b>P S G</b>                                                              | 329 |
| <hr/>        |     |                                                                                                                                                                                                                                                  |     |
| mouse BAF53a | 308 | <b>L F D</b> P - - - - - - - - - - - - - - - - - - - - - - - - - - - S N V K G L S <b>G</b> - - - - - - - - - - - - - - - <b>N T</b> <b>M L G</b> V S H V <b>V T</b> <b>T S</b> V <b>G M C D I D</b>                                             | 339 |
| mouse BAF53b | 305 | <b>L F D</b> P - - - - - - - - - - - - - - - - - - - - - - - - - - - S N V K G L S <b>G</b> - - - - - - - - - - - - - - - <b>N T</b> <b>M L G</b> V G H V <b>V T</b> <b>T S</b> I <b>G M C D I D</b>                                             | 336 |
| fly BAP55    | 313 | <b>L F D</b> - - - - - - - - - - - - - - - - - - - - - - - - - - - - - - - - - - - - - - - <b>N A</b> <b>M L G</b> A G Q L A S <b>T S</b> V <b>G M C D A D</b>                                                                                   | 335 |
| yeast arp4   | 330 | V N K S D K K V T P T E E K E Q E A V S K S T S P A A N S A D T P N E T <b>G</b> K R P L E E E K P P K E N <b>N E</b> L I <b>G</b> L A D L <b>V Y S S</b> I M S S <b>D V D</b>                                                                   | 399 |
| <hr/>        |     |                                                                                                                                                                                                                                                  |     |
| mouse BAF53a | 340 | I <b>R P</b> G <b>L Y G S V</b> I <b>V A G G N T L</b> I <b>Q S F T</b> <b>D R L N R E L</b> S Q K T <b>P P</b> <b>S M</b> <b>R L K L I A N N T T V</b> <b>E R R</b> <b>F S S</b> <b>W I G G S I L A S L G T F Q Q M</b>                         | 409 |
| mouse BAF53b | 337 | I <b>R P</b> G <b>L Y G S V</b> I <b>V T G G N T L L</b> <b>Q G F T</b> <b>D R L N R E L</b> S Q K T <b>P P</b> <b>S M</b> <b>R L K L I A S N S T M</b> <b>E R R</b> <b>K F S P</b> <b>W I G G S I L A S L G T F Q Q M</b>                       | 406 |
| fly BAP55    | 336 | V <b>R L S L F G S V V</b> <b>V T G G N T L L</b> <b>Q G F P</b> <b>E R L N R D L</b> Q L R A <b>P S N T</b> <b>R L K M I S A N G S V</b> <b>E R R</b> <b>F G A</b> <b>W I G G S I L A S I G T F Q Q M</b>                                       | 405 |
| yeast arp4   | 400 | L <b>R A</b> T <b>L A H N V</b> V <b>L T G G T S S I P G L S</b> <b>D R L M T E L</b> N K I L <b>P</b> - <b>S</b> L K F R I L T T G H <b>T I</b> <b>E R</b> Q Y Q S <b>W L G G S I L T S L G T F H Q L</b>                                       | 468 |
| <hr/>        |     |                                                                                                                                                                                                                                                  |     |
| mouse BAF53a | 410 | <b>W I S K Q E Y E E</b> G <b>G K</b> Q C <b>V E R K C P</b>                                                                                                                                                                                     | 429 |
| mouse BAF53b | 407 | <b>W I S K Q E Y E E</b> G <b>G K</b> Q C <b>V E R K C P</b>                                                                                                                                                                                     | 426 |
| fly BAP55    | 406 | <b>W I S S Q E Y E E</b> A <b>G K S Q</b> <b>V E R K C P</b>                                                                                                                                                                                     | 425 |
| yeast arp4   | 469 | <b>W V G K K E Y E E</b> V <b>G</b> V E R L L N D R F R                                                                                                                                                                                          | 489 |



### BAF45a/SAYP

mouse BAF45a 1 M A A A G P G A A L **S**P G **R**C D S - - - - - **D**P - - - - - A **S**P G A Q **S**P K D D N **E**D - - - - - **N**S N D - - - - - G T H **P**C 42  
 Fly SAYP 1 M **S**R P **R**C V G G L K H Q P **D**P E R L K G L F **S**P - - - **S**P Q V F E **E**D T R M S A D L S **N**S N Q S M A S L M E P P L T **P**Q 58

mouse BAF45a 43 **K**R R R M G - - - - - **S**G D **S**S R **S**C E T **S**S **Q**D - - - - - L S F S Y **Y**P **A**E N L I **E**Y **K** **W**P P **D**E 82  
 Fly SAYP 59 **K**Q P D F L N N E E S Q **S**S M V **S**N V **S**M M D **S**N **Q**G Q S A D A I L G S A L K R P K K K K M E T C V A E D T D **Y**S **A**S S I A **E**Y **D** **W**P P **P**K 128

mouse BAF45a 83 - - - - - T G E Y Y **M**L **Q**E Q V **S**E **Y**L G V **T**S F K R K Y P D L **E** **R**R D L Y H K **E**K L Y **L**R **E**L N V I T **E**T Q **C**T **L**G L **T**A L R S D E V I 146  
 Fly SAYP 129 G C C P S K N R D T F **M**I **Q**E Q V A L **Y**L G I **T**S F K R K Y P D L **P** **R**R S V D M E **E**R N W **L**Q **E**K G L V S **E**K L **C**D **L**G I **T**A V W A S D I L 198

mouse BAF45a 147 **D**L **M**I K E Y P A **K**H A **E**Y S V I L Q E **K**E R Q R I T D **H**Y K **E**Y S Q M **Q**Q Q S T Q K **V**E **A**S K V P E Y I K K **A**A K K **A**A E F **N**S N L **N**R E 216  
 Fly SAYP 199 **D**I **M**Y A D F F D **K**Y E **E**Y K E Y I R R **K**- - - - - **H**L R **E**I E A K **Q**K A L G L T **V**G **A**G R G L Q A R D R **A**M L S **A**T K W **N**A Y F **N**K S 261

mouse BAF45a 217 **R**M E **E**R R A Y F **D**L Q T H V **I**Q V **P**Q G - - - - - K Y K V **L**P - - - - - T D **R**T K V S S **Y** 252  
 Fly SAYP 262 **R**K D **E**R Q S C M **D**L Q T F T **I**N Q **P**Q P R T A P T C T R L E R S T S D L I R A V A E E A N I P A P P N L **L**P P R D Y D E A F **R**N S D Y A **Y** 331

mouse BAF45a 253 **P**V A L I **P**G **Q**F Q E Y **Y**K R Y S **P**D **E**L R Y L **P**L N **T**A L Y E **P**P L **D**P E L P A **L**D S D - - - - - **G**D **S**D - - - - - D G E **D**G **G**G - - - 308  
 Fly SAYP 332 **P**L T V V **P**D **Q**F S M A **Y**R Q F E **P**A **E**L R A Y **P**L D **T**A L D K **P**P T **D**L M A Q L **L**Q A K S E A V **G**- **S**D E I K T S A P A P K **D**L **G**Q E Q S 400

mouse BAF45a 309 - - - - - **D**E K **R**K N K G T **S**D **S**S S G N **V**S E G D **S**P P D **S**Q E **D**T F H **G**R Q K **S**K D K V A T P R K **D**G 356  
 Fly SAYP 401 A I K S V T V T A P V R R S R R S T R Q Q T **D**K V **R**T A S S S **S**T **S**S A Q S **V**S S A S **S**G N G **S**S S **D**T E S **G**D E - **S**- - - - - **D**F 460

mouse BAF45a 357 **S**K R **S**V L **S**K **S**A P G Y K P K V I P N - - - - - A L **C**G I **C**L K G K E S **N**K K G K A **E**S L **I**H **C**S Q **C**D N S G **H**P S C L **D**M 414  
 Fly SAYP 461 **S**S T **S**S C **S**S **S**T G A S S G A G S E D E D G N E C S S S V R L S T **C**G V **C**L R S Q H R **N**A R D M P **E**A F **I**R **C**Y T **C**R K R V **H**P S C V **D**M 530

mouse BAF45a 415 **T**V E L **V**S M I K T **Y**P **W**Q C M E **C**K T **C**I I **C**G Q P H H E E E **M**M F **C**D V **C**D R G Y H T F **C**V **G**L G A I **P**S **G**R W I **C**D C **C**Q R A P P T P 484  
 Fly SAYP 531 **P**P R M **V**G R V R N **Y**N **W**Q C A G **C**K C **C**I K **C**R S S Q R P G K **M**L Y **C**E Q **C**D R G Y H I Y **C**L **G**L R T V **P**D **G**R W S **C**E R **C**C F C M R C G 600

mouse BAF45a 485 R K V G R - - - - - R **G**K N **S**K E **G** 497  
 Fly SAYP 601 A T K P E G L P Q V A A L S Q A S **G**G P **S**A N **G**D R S K A A R N K R L K W V H E Y R I D H V T K I R E H A A M F C V P C A R N K P A K R Q S 670

mouse BAF45a 498 497  
 Fly SAYP 671 A A G A A G A A A V T P V L E A T S A Q T D D S P M P S P G L T T N G G R A L S P T A A L S P K A A V P V A S L P P V L E A T T V T T N I A 740

mouse BAF45a 498 497  
 Fly SAYP 741 G T I G R R Q A G N A V N I T T M Q C S S S S S N F S G N G V T E D A A N V T A T G T A T A A A G A P A A T P I G I A P P P V V A 806

### BAF45

|              |     |                                                                                                                                               |     |
|--------------|-----|-----------------------------------------------------------------------------------------------------------------------------------------------|-----|
| mouse BAF45b | 1   | M A T V I P S P L S - L G E D F Y R E A I E H C R S Y N A R L C A E R S L R L P F L D S Q T G V A Q N N C Y I W                               | 55  |
| mouse BAF45c | 1   | M A T V I H N P L K A L G D Q F Y K E A I E H C R S Y N S R L C A E R S V R L P F L D S Q T G V A Q N N C Y I W                               | 56  |
| mouse BAF45d | 1   | M A A V V E N V V K L L G E Q Y Y K D A M E Q C H N Y N A R L C A E R S V R L P F L D S Q T G V A Q S N C Y I W                               | 56  |
| fly dd4      | 1   | M A S K S A Y E K T L V V N I A N F E K I Q N F L N D K E K Y K E I L E N S E N F N T R L C I E R R L R M P F L D P Q T G V A Q T H C S L F   | 70  |
|              |     |                                                                                                                                               |     |
| mouse BAF45b | 56  | M E K T H R G P G L A P G Q I Y T Y P A R C W R K - K R - - - - - R L N I L E D P R L R P C E Y K I D C E A P L K K E G G L P E -             | 113 |
| mouse BAF45c | 57  | M E K R H R G P G L A P G Q L Y T Y P A R C W R K - K R - - - - - R L H P P E D P K L R L L E I K P E V E L P L K K D G F T S E -             | 114 |
| mouse BAF45d | 57  | M E K R H R G P G L A S G Q L Y S Y P A R R W R K - K R - - - - - R A H P P E D P R L S F P S I K P D T D Q T L K K E G L I S Q D             | 115 |
| fly dd4      | 71  | M K K K Q R M P G L R H G Q I Y T Y P S S R W R K P K R Q Y L L N P N Q S F R A Y Q Y R E H N L Q H S H H Q T H Q H H H I P S S G V A V P     | 140 |
|              |     |                                                                                                                                               |     |
| mouse BAF45b | 114 | G P V L E A L L C A E T G E K K - - - - - V E L K - - - - - E E E T I M D C Q K Q Q - - L L E F P H D L E V E D L E E D I P R R K N - - - -   | 167 |
| mouse BAF45c | 115 | S T T L E A L L R G E G V E K K - - - - - V D A R - - - - - E E E S I Q E I Q R V L E N D E N V E E G N E E E D L E E D V P R R K N - - - -   | 170 |
| mouse BAF45d | 116 | G S S L E A L L R T D P L E K R G A P D P R V D D D S L G E F P V S N S R A R K R I I E P D D F L D D L D D E D Y E E D T P K R R G - - - -   | 181 |
| fly dd4      | 141 | Q N P H L A E S A A I A A T D G N S M G A S G D N D S - - - - - K D S H A N V E K E W F H D E M D T S H F H H G D E F E D D F D S D N D F D E | 206 |
|              |     |                                                                                                                                               |     |
| mouse BAF45b | 168 | - - R A R G K A Y G I G G L R K R Q D T A S L E D R D K P Y V C D I C G K R Y K N R P - G L S - - - - - - - - - - - - - - - - - - - -         | 211 |
| mouse BAF45c | 171 | - - R T R G R A R G S A G G R R R H D A S Q E D H D K P Y V C D I C G K R Y K N R P - G L S - - - - - - - - - - - - - - - - - - - -           | 214 |
| mouse BAF45d | 182 | - - K G K S K S K G V S S A R K K L D A S I L E D R D K P Y A C D I C G K R Y K N R P - G L S - - - - - - - - - - - - - - - - - - - -         | 225 |
| fly dd4      | 207 | S Y T S R G K R K K C S - - R P R R T N A N V E G T P K - R G R K G G G N R R K N A V E G E S D R K R R A G G N S A N T S A A A A A A A A     | 273 |
|              |     |                                                                                                                                               |     |
| mouse BAF45b | 212 | - Y H Y T H T H L A E E E G E E H T - - E R H A L P F H R K N - - - - - - - - - - - - - - - - - - - - - - - - - - - - - - - -                 | 239 |
| mouse BAF45c | 215 | - Y H Y A H T H L A S E E G D E A Q D Q E T R S P P N H R - - - - - - - - - - - - - - - - - - - - - - - - - - - - - - - -                     | 242 |
| mouse BAF45d | 226 | - Y H Y A H S H L A E E E G E D K E D S R P P T P V S Q R S - - - - - - - - - - - - - - - - - - - - - - - - - - - - - - - -                   | 254 |
| fly dd4      | 274 | V A H A A C T A A A V A S T G L Y A S H S N S A S P I P I N D D N S Q S G L I L P T N I S S S Y D K T S S D A G A S N D S I P L A T M V A I   | 343 |
|              |     |                                                                                                                                               |     |
| mouse BAF45b | 240 | - - - - - - - - - N H K Q F Y K E L A W V P E A Q R K H T A K K A P D G T V I P N N G Y C D F C L G G S - - - K K T G C P E D L I S C A D C   | 296 |
| mouse BAF45c | 243 | - - - - - - - - - N - - - - - - - - - - - - - - - - - - - - - - - - - - - - - - - - - - - - - - - - - - - - - - - - - - - -                   | 287 |
| mouse BAF45d | 255 | - - - - - - - - - - - - - - - - - - - - - - - - - - - - - - - - - - - - - - - - - - - - - - - - - - - - - - - - - - - - - - -                 | 298 |
| fly dd4      | 344 | N A G L T T S N V C N A H P V Q T G T N Q T V F A T G N K V K Q R V E R D I A Q P S P Y C D F C L G D Q R E N K K T N M P E E L V S C S D C   | 413 |
|              |     |                                                                                                                                               |     |
| mouse BAF45b | 297 | G R S G H P S C L Q F T V N M T A A V R T Y R W Q C I E C K S C S L C G T S E N D D Q L L F C D D C D R G Y H M Y C L S P P M A E P P E G S   | 366 |
| mouse BAF45c | 288 | G R S G H P T C L Q F T L N M T E A V K T Y K W Q C I E C K S C I L C G T S E N D D Q L L F C D D C D R G Y H M Y C L N P P V A E P P E G S   | 357 |
| mouse BAF45d | 299 | G R S G H P S C L Q F T P V M M A A V K T Y R W Q C I E C K C C N L C G T S E N D D Q L L F C D D C D R G Y H M Y C L T P S M S E P P E G S   | 368 |
| fly dd4      | 414 | G R S G H P S C L Q F T A N M I I S V K R Y R W Q C I E C K Y C S I C G T S D N D D Q L L F C D D C D R G Y H M Y C L S P P L V T P P E G S   | 483 |
|              |     |                                                                                                                                               |     |
| mouse BAF45b | 367 | W S C H L C L R H L K E K A S A Y I T L T                                                                                                     | 387 |
| mouse BAF45c | 358 | W S C H L C W E L L K E K A S A F G C Q A                                                                                                     | 378 |
| mouse BAF45d | 369 | W S C H L C L D L L K E K A S I Y Q N Q N S S                                                                                                 | 391 |
| fly dd4      | 484 | W S C K L C M E E F H K I K                                                                                                                   | 497 |

actin

|              |     |                                                                                                                                                                                                                   |     |
|--------------|-----|-------------------------------------------------------------------------------------------------------------------------------------------------------------------------------------------------------------------|-----|
| mouse bactin | 1   | <b>M</b> D D I <b>A</b> A L V V D N G S G M C K A G F A G D D A P R A V F P S I V G R P R H Q G V M V G M G Q K D S Y V G D E A Q S K R G I L T L K Y                                                             | 69  |
| fly bactin   | 1   | M <b>C</b> <b>D</b> E <b>E</b> V A A L V V D N G S G M C K A G F A G D D A P R A V F P S I V G R P R H Q G V M V G M G Q K D S Y V G D E A Q S K R G I L T L K Y                                                  | 70  |
| yeast actin  | 1   | <b>M</b> <b>D</b> S <b>E</b> V A A L V <b>I</b> D N G S G M C K A G F A G D D A P R A V F P S I V G R P R H Q G <b>I</b> M V G M G Q K D S Y V G D E A Q S K R G I L T L <b>R</b> <b>Y</b>                        | 69  |
| mouse bactin | 70  | <b>P</b> I E H G I V T N W D D M E K I W H H T F Y N E L R V A P E E H P V L L T E A P L N P K A N R E K M T Q I M F E T F N T P A M Y V A I Q A V                                                                | 139 |
| fly bactin   | 71  | <b>P</b> I E H G I V T N W D D M E K I W H H T F Y N E L R V A P E E H P V L L T E A P L N P K A N R E K M T Q I M F E T F N T P A M Y V A I Q A V                                                                | 140 |
| yeast actin  | 70  | <b>P</b> I E H G I V T N W D D M E K I W H H T F Y N E L R V A P E E H P V L L T E A P <b>M</b> N P K <b>S</b> N R E K M T Q I M F E T F N <b>V</b> P A <b>F</b> Y V <b>S</b> I Q A V                             | 139 |
| mouse bactin | 140 | <b>L</b> S L Y A S G R T T G I V <b>M</b> D S G D G V T H T V P I Y E G Y A L P H A I L R L D L A G R D L T D Y L M K I L T E R G Y S F T T T A E R E I V                                                         | 209 |
| fly bactin   | 141 | <b>L</b> S L Y A S G R T T G I V L D S G D G V <b>S</b> H T V P I Y E G Y A L P H A I L R L D L A G R D L T D Y L M K I L T E R G Y S F T T T A E R E I V                                                         | 210 |
| yeast actin  | 140 | <b>L</b> S L Y <b>S</b> S G R T T G I V L D S G D G V T H <b>V</b> V P I Y <b>A</b> G <b>F</b> S L P H A I L R <b>I</b> D L A G R D L T D Y L M K I L <b>S</b> E R G Y S <b>F</b> <b>S</b> T T A E R E I V        | 209 |
| mouse bactin | 210 | <b>R</b> D I K E K L C Y V A L D F E Q E M A T A A S S S S L E K S Y E L P D G Q V I T I G N E R F R C P E A L F Q P S F L G M E S C G I H E T T <b>F</b>                                                         | 279 |
| fly bactin   | 211 | <b>R</b> D I K E K L C Y V A L D F E Q E M A T A A S S S S L E K S Y E L P D G Q V I T I G N E R F R C P E A L F Q P S F L G M E <b>A</b> C G I H E T T <b>Y</b>                                                  | 280 |
| yeast actin  | 210 | <b>R</b> D I K E K L C Y V A L D F E Q E M <b>Q</b> T A A <b>Q</b> S S S <b>I</b> E K S Y E L P D G Q V I T I G N E R F R <b>A</b> P E A L F <b>H</b> P S <b>V</b> L G <b>L</b> E S <b>A</b> G I D Q T T <b>Y</b> | 279 |
| mouse bactin | 280 | <b>N</b> S I M K C D V D I R K D L Y A N T V L S G G T T M Y P G I A D R M Q K E I T A L A P S T M K I K I I A P P E R K Y S V W I G G S I L A S L                                                                | 349 |
| fly bactin   | 281 | <b>N</b> S I M K C D V D I R K D L Y A N T V L S G G T T M Y P G I A D R M Q K E I T A L A P S T M K I K I I A P P E R K Y S V W I G G S I L A S L                                                                | 350 |
| yeast actin  | 280 | <b>N</b> S I M K C D V D <b>V</b> R K <b>E</b> L Y <b>G</b> N <b>I</b> V <b>M</b> S G G T T M <b>F</b> P G I A <b>E</b> R M Q K E I T A L A P S <b>S</b> M K <b>V</b> K I I A P P E R K Y S V W I G G S I L A S L | 349 |
| mouse bactin | 350 | <b>S</b> T F Q Q M W I S K Q E Y D E S G P S I V H R K C F                                                                                                                                                        | 375 |
| fly bactin   | 351 | <b>S</b> T F Q Q M W I S K Q E Y D E S G P S I V H R K C F                                                                                                                                                        | 376 |
| yeast actin  | 350 | <b>T</b> T F Q Q M W I S K Q E Y D E S G P S I V H <b>H</b> K C F                                                                                                                                                 | 375 |









### BAF250

|               |     |                                                                                                                                                         |     |
|---------------|-----|---------------------------------------------------------------------------------------------------------------------------------------------------------|-----|
| human BAF250a | 1   | M A A Q V A P A A A S S L G N - - P P P P P - P S E L K K A E Q Q Q R E E A G G E A A A A A A A E R G E M K A A A G Q E S - - - E G P A V               | 63  |
| human BAF250b | 1   | M E T G L L P N H K L K T V G - - E A P A A - P P H Q Q H H H H H H A H H H H H H A H H L H H H H A L Q Q Q L N Q F Q Q Q - - - Q Q Q Q Q               | 63  |
| fly Osa       | 1   | M N E K I K S P Q T Q Q Q Q G G A P A P A A T P P S A G A A P G A A T P P T S G P P T P N N N S N N G S D P S I Q Q Q Q Q N V A P H P Y G               | 70  |
| yeast swi1    | 1   | M D F F N L N N N N N N N - - T T T T - - - - - - - - T T T T N N N N T N N N N T N N N N N P A N N T N - - - - - - - - - - -                           | 43  |
| human BAF250a | 64  | G P P Q P - L G K E L Q D G A E S N G G G G G G A G S - G G G P G A E P D L K N S N G N A G P R P A L N N N L T E P - P G - - - - - - - - G             | 123 |
| human BAF250b | 64  | Q Q Q Q Q - Q Q Q Q H P I S N N N S L G G A G - - - G G A P Q P G P D M E Q P Q - H G G A K D S A A G G Q A D P - P G P P L L S K P G                   | 125 |
| fly Osa       | 71  | A P P P P G S G P G G P P G P D P A A V M H Y H H L H Q Q Q Q Q H P P P P H M Q Q Q Q H H G G P A P P P P G G A P E H A P G - - - - - V K E             | 135 |
| yeast swi1    | 44  | - - - - - - - - - - - N N S T G H S S - - - - - - - - - - - N T N - - - - - N N T N N N N T N T - G - - - - - - - - -                                   | 66  |
| human BAF250a | 124 | G G G G S S D G V G A P P H S A A A A L P - P P A Y G F G Q P Y G R S P S A V A A A A A A V F H Q Q H G G Q Q S P G L A A L Q S G G G G L               | 192 |
| human BAF250b | 126 | D E D D A P P K M G E P A G G R Y E H P G - L G A L G T Q Q P P V A V P G G G G P A A V P E F N N Y Y G S A A P - - - A S - - - G P G - - -             | 187 |
| fly Osa       | 136 | E Y T H L P P P H P H P A Y G R Y H A D P N M D P Y R Y G Q P - - - L P G G - K P P Q Q Q P H P Q Q P P Q Q P - - - - - G - - - P G G S -               | 193 |
| yeast swi1    | 67  | - - - - - - - - - - - A S G V D D F Q N - - - - - F F D - - - - - P - - - - - - - - - - - K P - - - - - F - - - - - - - - -                             | 82  |
| human BAF250a | 193 | E P Y A G P Q Q N S H D H G F P N H - - - Q Y N S Y Y P N R S A Y P P P A P A Y A L S S - P R - - - - - G G T P G S G A A A A A G S K P P               | 252 |
| human BAF250b | 188 | - G R A G P C F D Q H G G Q Q S P G - - - M G M M H S A S A A A A G A P G S M D P L Q N - S H - - - - - E G Y P N S Q C N H Y P G Y S R P P             | 246 |
| fly Osa       | 194 | - P N R P P Q Q R Y I P G Q P P Q G P T P T L N S L L Q S S N P P P P Q H R Y A N T Y D P Q Q A A A S A A A A A Q Q Q Q A G G P P P P                   | 262 |
| yeast swi1    | 83  | - - - - - - - - - - - D Q N L D - - - S N N - - - - - N N S N S N N N - - - - - - - - - - - D N N N S - - - N - - - - - T V A S S T N - - - - - F T S P | 115 |
| human BAF250a | 253 | P S S S A S A S S S S S S F A Q Q R F G A M G G G G P S A A G G G T P Q P T A T P T L N Q L L T S P S S A R G Y Q G Y P G G D Y S G G - P Q             | 321 |
| human BAF250b | 247 | G A G G G G G G G G G - - G G G S G G G G G G G A G A G A G A V A A A A A A A A A A G G G G G G Y G G S S A G Y G V L S S P P R                         | 314 |
| fly Osa       | 263 | G H G P P P P Q H Q P S P Y G G Q Q G G W A P P R P Y S P Q L G P S Q Q Y R T P P T N T S R G Q S P Y P P A H G Q N S G S Y P S S - P Q                 | 331 |
| yeast swi1    | 116 | - - - - - - - - - - - A N V T G G K A A N F I Q - - - - - N Q S P - - - - - S I I D - - - - - - - - - - - - - - - - - - -                               | 124 |
| human BAF250a | 322 | D G G A G K G P A D M A S Q C W G A A A A A A A A A A S G G A Q Q R S H H A P M S P G S S G G G G Q P L A R T P Q P S S P M D Q M G K M R               | 391 |
| human BAF250b | 315 | Q Q G G G - - - M M M G P G G G G A A A S L S K A A A G G S A A G G F Q R F A G Q N Q H P S G A T P T L N Q L L T S P S P - - - M M R S Y G G S Y       | 379 |
| fly Osa       | 332 | Q Q Q Q Q - - - Q Q Q Q Q Q A G Q Q P G P V P G G P P P G T G Q Q Q P P Q Q N T P P T S Q Y S P Y P - - - Q R Y P T P - - - P G L P A G G S N           | 394 |
| yeast swi1    | 125 | - - - - - - - - - - - - - - - - - A N V T G G K A A N F I Q - - - - - N Q S P - - - - - S I I D - - - - - - - - - - - - - - - - - - -                   | 153 |
| human BAF250a | 392 | P Q P Y G G T N P Y S Q Q Q G P P S D P Q Q G H G Y P G Q P Y G S Q T P Q R Y P M T V Q G R A Q S A M G G L S Y T Q Q I P P Y G Q Q G P - S             | 460 |
| human BAF250b | 380 | P E Y S S P S A P P P - - - P P S Q P Q S Q A A A A G A A A G G Q Q - - - - - A A A G M G L G K D M G A Q Y A A A S P A W A A A Q Q R S                 | 439 |
| fly Osa       | 395 | H R T A Y S T H Q Y P - - - E P N R P W P G G S S P S P G S G H P L P - - - - - P A S P H H V P P L Q - - - Q Q P P P P P H V S A G G P - P             | 452 |
| yeast swi1    | 154 | - - - - - T N L N S L S - - - - - - - - - - - P Q A I L A K N - - - - - - - - - - - S I I D - - - - - - - - - - - - - - - - - - -                       | 172 |
| human BAF250a | 461 | G Y G Q Q G Q T P Y Y N Q Q S P H P Q Q Q Q P P Y S Q Q P P S Q T P H A Q P S Y Q Q Q P Q S Q P P Q L Q S S Q P P Y S Q - - - - - Q P S Q P             | 525 |
| human BAF250b | 440 | H P A M S P G T P G P T M G R S Q G S P M D P M V M K R P Q L Y G M G S N P H S Q P Q - - - Q S S P Y P G G S Y G P P G P Q R Y P I G I Q G R T         | 508 |
| fly Osa       | 453 | P S S S P G H A P S P - - - S P Q P S Q A S P - - - S P H Q E L I G Q N S N D S S S G G - A H S G M G S G P P G T P N P Q Q - - - V M R P T P S         | 514 |
| yeast swi1    | 173 | - - - - - S S N L P L Q - - - - - - - - - - - - - - - - - A Q Q Q L Y G G N N N - - - - - - - - - - - - - - - - - - - - - - - - -                       | 203 |
| human BAF250a | 526 | P H Q Q S P A P Y P S Q Q S T T Q Q H P Q S Q P P Y S Q P Q A Q S P Y Q Q Q Q P Q Q P A P S T L S Q Q A A Y P - - - Q P Q S Q Q S Q Q T A Y S           | 593 |
| human BAF250b | 509 | P G A M A G M Q Y P Q Q M P P Q Y G Q Q G V S G Y C Q - - - Q G Q Q P Y Y S Q Q P Q - - - P P H L P P Q A Q Y L - - - P S Q S Q Q - - - - - - - -       | 565 |
| fly Osa       | 515 | P T G S S G S R S - M S P A V A Q N H P I S R P A S N Q S S S G G P M Q Q P P V G A G G P P P M P P H P G M P G G P P Q Q Q - - - - - - -               | 576 |
| yeast swi1    | 204 | P H F I T N V Q S - - - - - I S Q N S S S S T P N T N S - - - N S T P N - - - - - - - - - - - - - - - - - - - - - - - - -                               | 235 |
| human BAF250a | 594 | Q Q R F P P P Q E L S Q D S F G S Q A S S A P S M T S S K G Q Q E D M N L S L Q S R P S S L P D L S G S I D D L P M G T E G A L S P G V S T             | 663 |
| human BAF250b | 566 | - - R Y Q P Q Q D M S Q E G Y G T R S Q - - - P P L A P G K P N H E D L N L I Q Q E R P S S L P D L S G S I D D L P T G T E A T L S S A V S A           | 631 |
| fly Osa       | 577 | - - S Q Q Q A S N S A S S A S N S P Q Q T P P P A P - P P N Q - G M N N M A T P P P - - - P P Q G A A G G G Y P M P P H - - - M H G G Y K M             | 637 |
| yeast swi1    | 236 | - - - F L P - F N N S A S N N G N L T S - - - - - - - - - - - N Q L I S N Y A A S N S M D - - - R S S A S N E F V P N T S D - - - - - N N N             | 283 |







**BAF200**

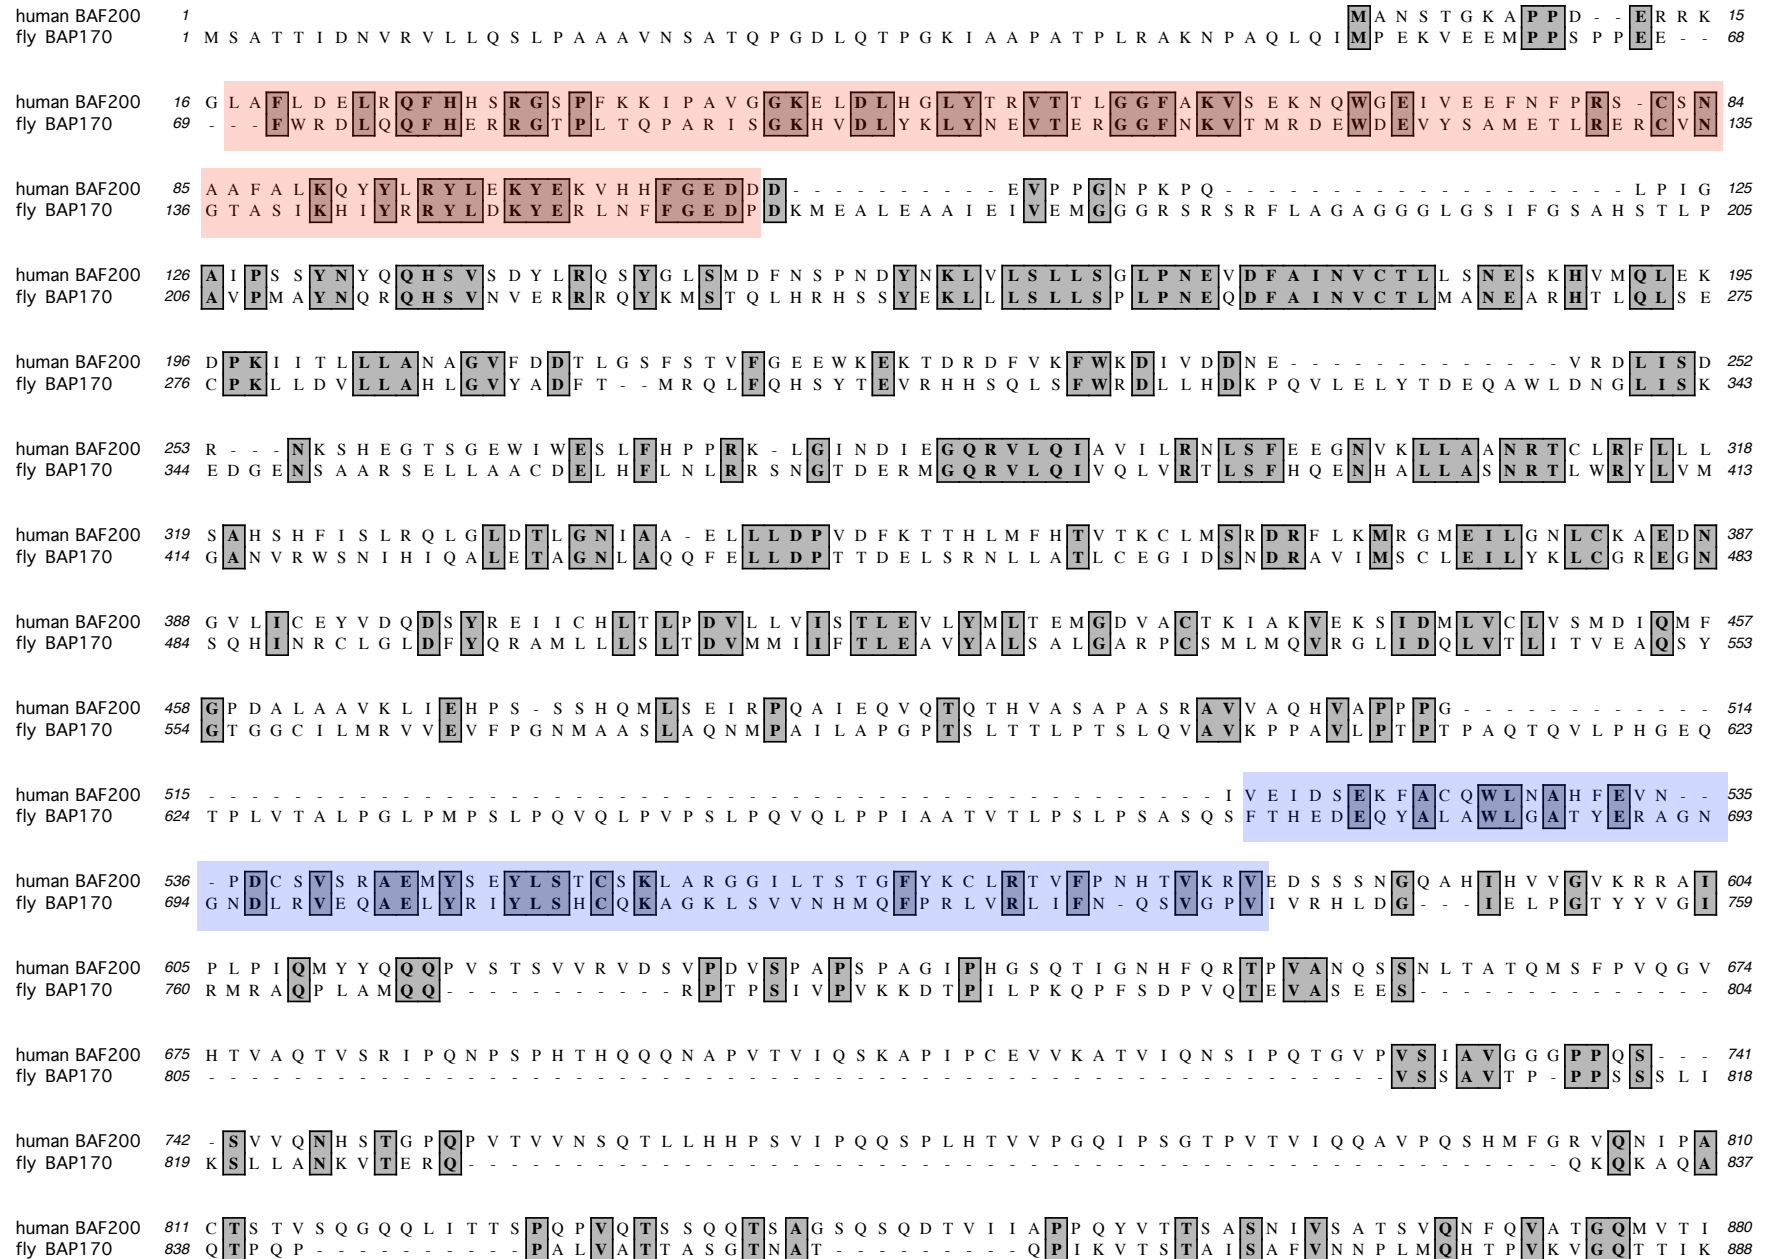

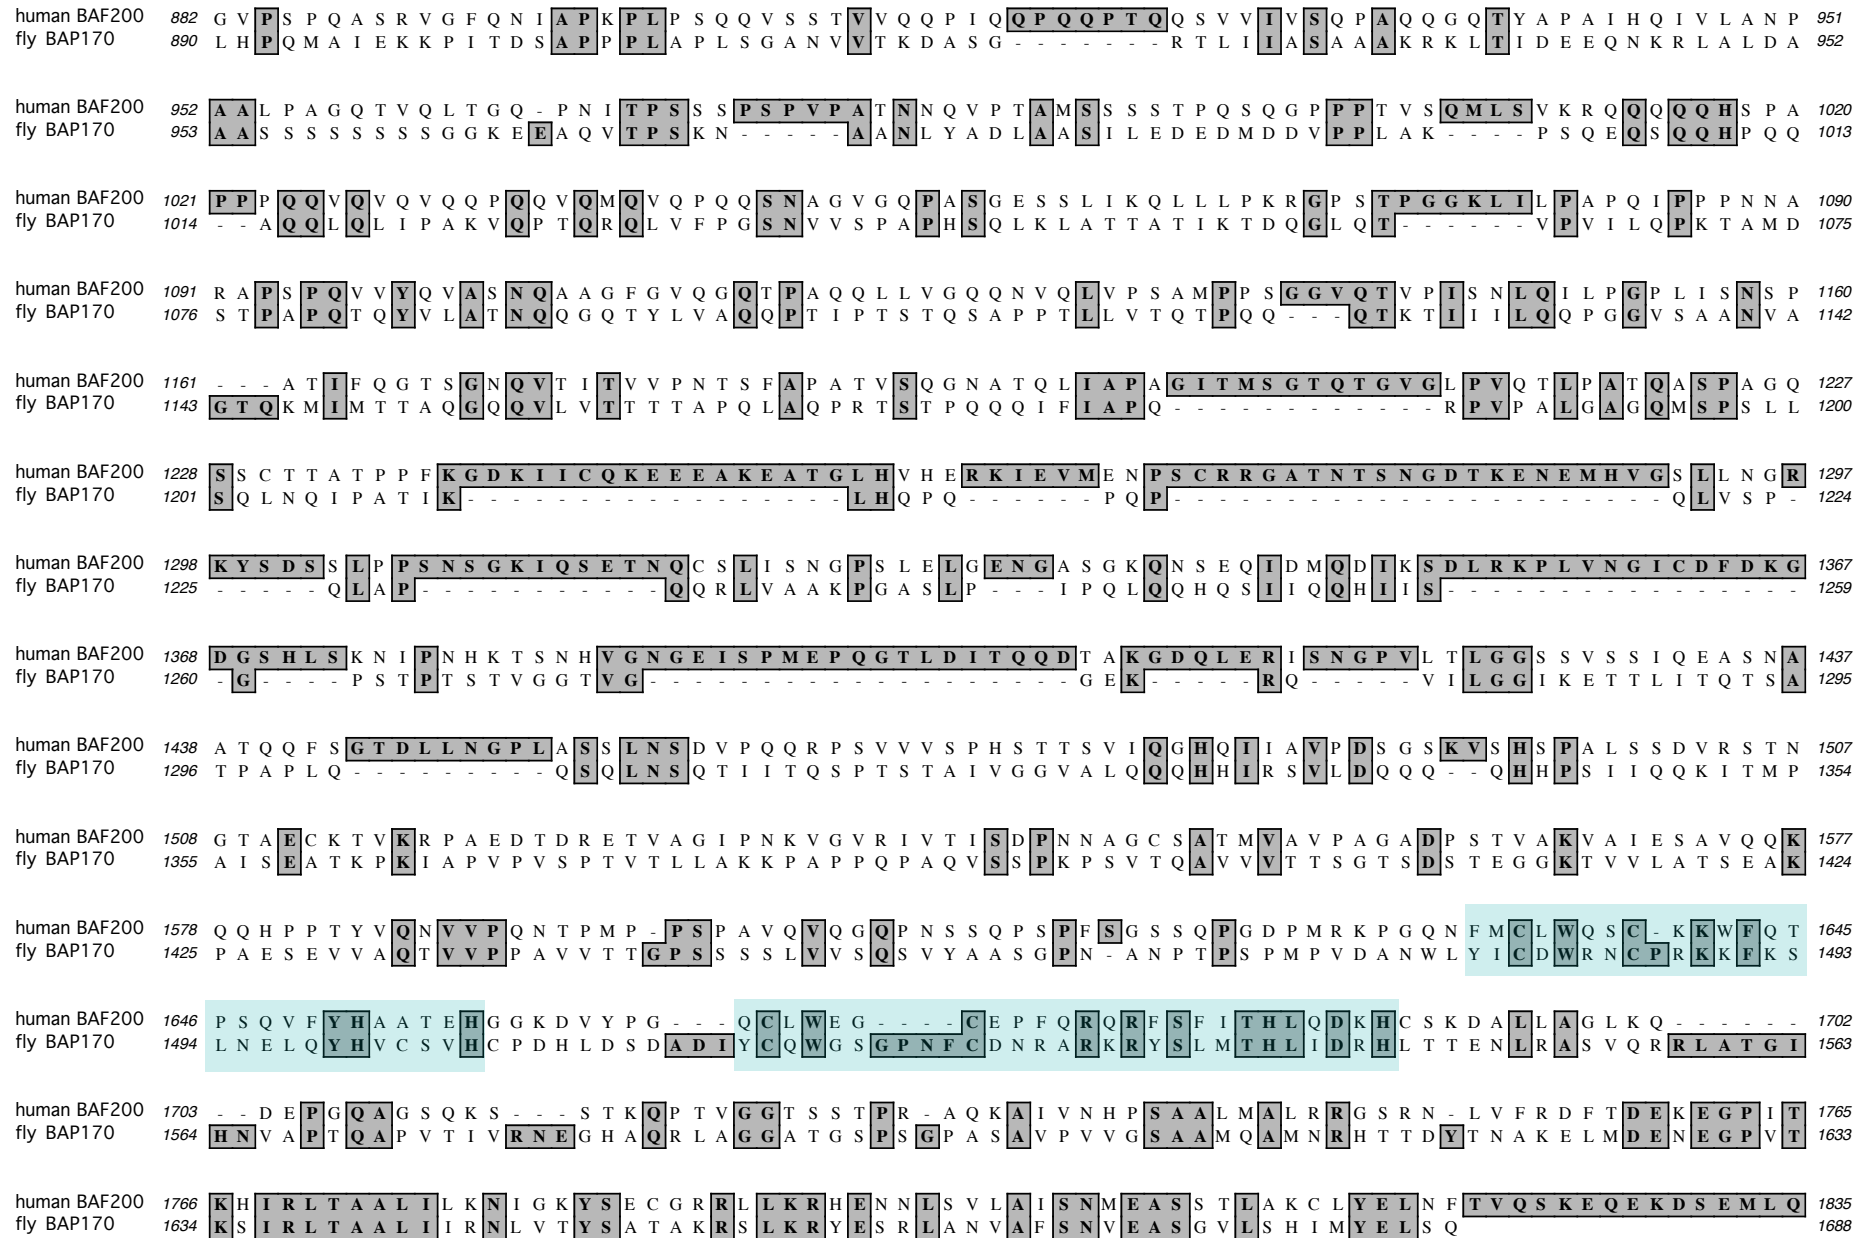



### ARID Domain

|                      |      |                                                                                                                                                                                                                                                                                                                                                                                                              |      |
|----------------------|------|--------------------------------------------------------------------------------------------------------------------------------------------------------------------------------------------------------------------------------------------------------------------------------------------------------------------------------------------------------------------------------------------------------------|------|
| <i>human BAF250a</i> | 1008 | I T <b>K</b> L Y <b>E</b> L G G G <b>P</b> <b>E</b> <b>R</b> <b>K</b> - - M W V <b>D</b> R Y L A <b>F</b> <b>T</b> <b>E</b> <b>K</b> A M G M T N L <b>P</b> A V <b>G</b> <b>R</b> <b>K</b> <b>P</b> <b>L</b> <b>D</b> <b>L</b> Y R <b>L</b> Y V S <b>V</b> <b>K</b> <b>E</b> <b>I</b> <b>G</b> <b>G</b> L T Q <b>V</b> <b>N</b> <b>K</b> <b>N</b> <b>K</b> <b>K</b> <b>W</b> <b>R</b>                        | 1075 |
| <i>human BAF250b</i> | 1039 | I T <b>K</b> V Y <b>E</b> L G N E <b>P</b> <b>E</b> <b>R</b> <b>K</b> - - L W V <b>D</b> R Y L T <b>F</b> <b>M</b> <b>E</b> <b>E</b> <b>R</b> <b>G</b> S <b>P</b> V S S L <b>P</b> A V <b>G</b> <b>K</b> <b>K</b> <b>P</b> <b>L</b> <b>D</b> <b>L</b> F R <b>L</b> Y V C <b>V</b> <b>K</b> <b>E</b> <b>I</b> <b>G</b> <b>G</b> L A Q <b>V</b> <b>N</b> <b>K</b> <b>N</b> <b>K</b> <b>K</b> <b>W</b> <b>R</b> | 1106 |
| <i>human BAF200</i>  | 2    | A N S T G K A P P D E R <b>R</b> <b>K</b> G L A <b>F</b> <b>L</b> <b>D</b> <b>E</b> <b>L</b> R Q <b>F</b> <b>H</b> <b>H</b> S <b>R</b> <b>G</b> S <b>P</b> F K K I <b>P</b> A V <b>G</b> <b>G</b> <b>K</b> <b>E</b> <b>L</b> <b>D</b> <b>L</b> H G <b>L</b> Y T R V <b>T</b> <b>T</b> <b>L</b> <b>G</b> <b>G</b> F A K <b>V</b> S <b>E</b> <b>K</b> <b>N</b> <b>Q</b> <b>W</b> <b>G</b>                      | 71   |
| <i>fly Osa</i>       | 991  | L C <b>K</b> L Y <b>E</b> M D D N <b>P</b> <b>D</b> <b>R</b> R - - G W L <b>D</b> <b>K</b> <b>L</b> R A <b>F</b> <b>M</b> <b>E</b> <b>R</b> <b>R</b> T <b>P</b> I T A C <b>P</b> <b>T</b> <b>I</b> S K Q <b>P</b> <b>L</b> <b>D</b> <b>L</b> Y R <b>L</b> Y I Y <b>V</b> <b>K</b> <b>E</b> <b>R</b> <b>G</b> <b>G</b> F V E <b>V</b> <b>T</b> <b>K</b> S K T <b>W</b> <b>K</b>                               | 1056 |
| <i>fly BAP170</i>    | 54   | M P E <b>K</b> V E <b>E</b> M P P S <b>P</b> P E E - - <b>F</b> W R D <b>L</b> Q Q <b>F</b> <b>H</b> <b>E</b> <b>R</b> <b>R</b> G T <b>P</b> L T Q P A R <b>I</b> S G <b>K</b> <b>H</b> <b>V</b> <b>D</b> <b>L</b> Y K <b>L</b> Y N E <b>V</b> <b>T</b> <b>E</b> <b>R</b> <b>G</b> <b>G</b> F N K <b>V</b> <b>T</b> <b>M</b> R D E <b>W</b> <b>D</b>                                                         | 121  |
| <i>yeast swi1</i>    | 411  | - - - - - L <b>F</b> <b>M</b> <b>K</b> <b>S</b> <b>L</b> I E N C <b>K</b> <b>K</b> <b>R</b> <b>N</b> <b>M</b> <b>P</b> L Q S I <b>P</b> <b>E</b> <b>I</b> <b>G</b> <b>N</b> R <b>K</b> I <b>N</b> <b>L</b> F Y <b>L</b> Y M L <b>V</b> Q K <b>F</b> <b>G</b> <b>G</b> A D Q <b>V</b> <b>T</b> <b>R</b> T Q Q <b>W</b> <b>S</b>                                                                               | 463  |
| <i>yeast Rsc9</i>    | 200  | T G D N K W Q L Y E G N A - - - - <b>T</b> <b>F</b> <b>N</b> <b>E</b> <b>L</b> T H Y T L D L M E A I S S Y - - <b>I</b> A P A M <b>K</b> <b>D</b> D H Y F Q T L <b>V</b> S - - - - I L N Y <b>T</b> <b>K</b> - D R Y M                                                                                                                                                                                       | 258  |
|                      |      |                                                                                                                                                                                                                                                                                                                                                                                                              |      |
| <i>human BAF250a</i> | 1076 | <b>E</b> <b>L</b> <b>A</b> T N <b>L</b> N V G T <b>S</b> - S <b>S</b> <b>A</b> <b>A</b> S S <b>L</b> <b>K</b> <b>K</b> <b>Q</b> <b>Y</b> I Q C <b>L</b> Y A F <b>E</b> C K I                                                                                                                                                                                                                                 | 1107 |
| <i>human BAF250b</i> | 1107 | <b>E</b> <b>L</b> <b>A</b> T N <b>L</b> N V G T <b>S</b> - S <b>S</b> <b>A</b> <b>A</b> S S <b>L</b> <b>K</b> <b>K</b> <b>Q</b> <b>Y</b> I Q Y <b>L</b> F A F <b>E</b> C K I                                                                                                                                                                                                                                 | 1138 |
| <i>human BAF200</i>  | 72   | <b>E</b> I V E E F N F P R <b>S</b> - C <b>S</b> <b>N</b> <b>A</b> A F A L <b>K</b> <b>Q</b> <b>Y</b> Y L R Y <b>L</b> E K Y E K V                                                                                                                                                                                                                                                                           | 103  |
| <i>fly Osa</i>       | 1057 | D I <b>A</b> G L <b>L</b> G I G A <b>S</b> - S <b>S</b> <b>A</b> <b>A</b> Y T <b>L</b> R <b>K</b> <b>H</b> <b>Y</b> T K N <b>L</b> L T F <b>E</b> C H F                                                                                                                                                                                                                                                      | 1088 |
| <i>fly BAP170</i>    | 122  | <b>E</b> V Y S A M E T L R E R C V N G T A S I <b>K</b> H I Y R R Y <b>L</b> D K Y E R L                                                                                                                                                                                                                                                                                                                     | 154  |
| <i>yeast swi1</i>    | 464  | M V <b>A</b> Q R <b>L</b> Q I S D Y - - - Q Q L E S - I <b>Y</b> F R I <b>L</b> L P Y <b>E</b> R H M                                                                                                                                                                                                                                                                                                         | 490  |
| <i>yeast Rsc9</i>    | 259  | V I S - - - - I L R <b>S</b> - - - - - <b>L</b> S R L L V R S K A N E <b>E</b> S A A                                                                                                                                                                                                                                                                                                                         | 281  |
